# Supplementary material
Source: publisher figshare collection journal article supplement (https://gsapubs.figshare.com/articles/dataset/_/12541469)
Supplement: Supplementary file 1 [file 1]

## Natural fracture propping and earthquake-induced oil migration in fractured basement reservoirs

Holdsworth, R.E.<sup>1,2</sup>, McCaffrey, K.W.J.<sup>1,2</sup>, Dempsey, E.<sup>3</sup>, Roberts, N.M.W.<sup>4</sup>, Hardman, K.<sup>1</sup>, Morton, A.<sup>5</sup>, Feely, M.<sup>6</sup>, Hunt, J.<sup>6</sup>, Conway, A.<sup>7</sup>

<sup>1</sup> Department of Earth Sciences, Durham University, UK

<sup>2</sup> Geospatial Research Ltd, Durham, UK

<sup>3</sup> School of Environmental Sciences, University of Hull, UK

<sup>4</sup> British Geological Survey, Nottingham, UK

<sup>5</sup> HM Research and CASP., UK.

<sup>6</sup> NUI, Galway, Ireland.

<sup>7</sup> CONSCO Ltd, UK

### U-PB GEOCHRONOLOGY

Calcite U-Pb geochronology was conducted via Laser Ablation Inductively Coupled Mass Spectrometry (LA-ICP-MS) *in-situ* in polished blocks, at the NERC Isotope Geosciences Laboratory (Nottingham, UK) using a New Wave Research 193UC laser ablation system coupled to a Nu Instruments Attom ICP-MS, following a standard matrix-matched sample-bracketing method (see Beaudoin et al., 2018; Roberts & Walker, 2016). Laser parameters were a pre-ablation for 3 s using a 150  $\mu\text{m}$  spot, and ablation for 30 s with a 100  $\mu\text{m}$  spot at 10 Hz and 8 J/cm<sup>2</sup>. Normalisation of U-Pb ratios was achieved with the reference material WC-1 (Roberts et al., 2017), and Pb-Pb ratios were normalised using NIST 614 silicate glass (Woodhead & Hergt, 2001). Duff Brown carbonate (64.04  $\pm$  0.67 Ma; Hill et al., 2016) was analysed in the same session to provide validation, and yielded a lower intercept age of 64.2  $\pm$  2.2 Ma (MSWD = 0.79). All quoted ages and uncertainties are at 2 $\sigma$  and include propagation of systematic uncertainties according to the protocol of Horstwood et al. (2016).

A full data-table is provided in DRx.

### Sample information

206/7a-2 well (2559.5 m) – Clair field: “Clair Basement”

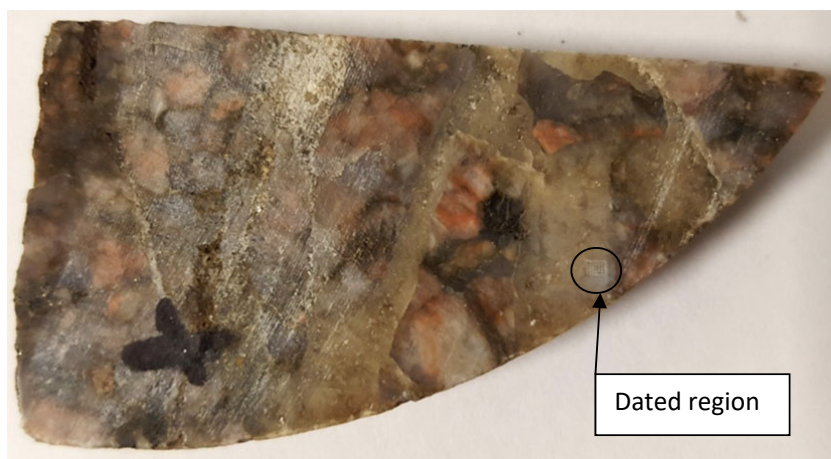

Sample of foliated granite cut by oil stained calcite-pyrite mineral fills in fracture connected to the structure shown in Fig 2a which also hosts earlier sediment and quartz cements. The calcite crystals carry numerous inclusions of oil suggesting that hydrocarbon was present at the time of calcite precipitation. See image below.

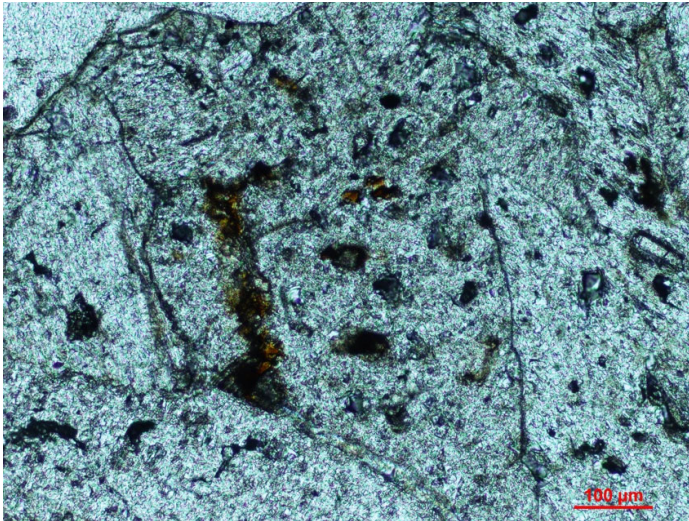

208/27-2 well – near Victory Field: “Victory Basement”

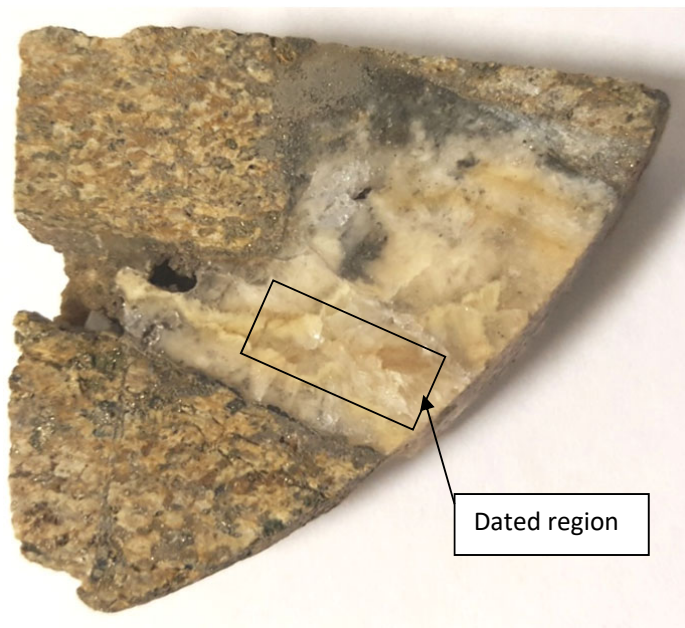

Granodioritic gneiss cut by quartz-calcite-pyrite filled fracture with large vug that originally hosted oil. The calcites here are hydrocarbon stained and zoned with numerous oil inclusions and are post-dated by quartz precipitation – see image below - the reverse relationship to that seen in the previous sample.



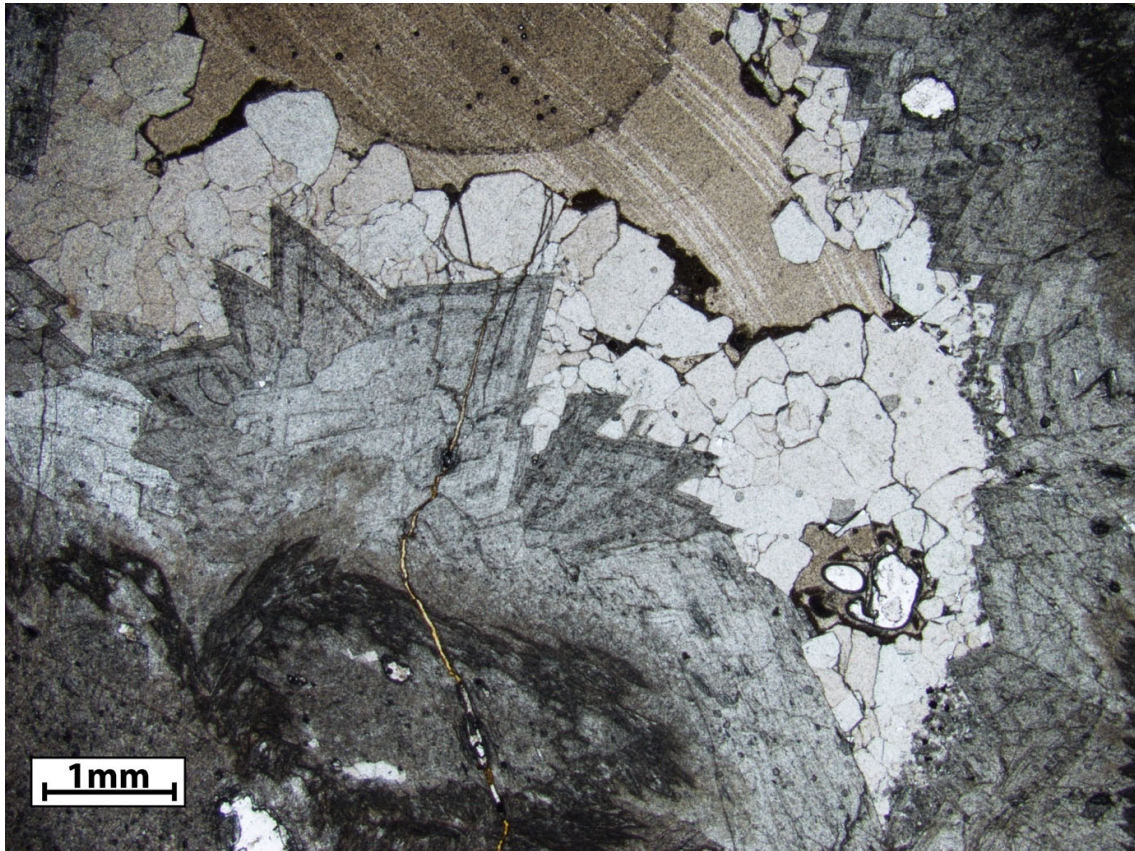

## Results

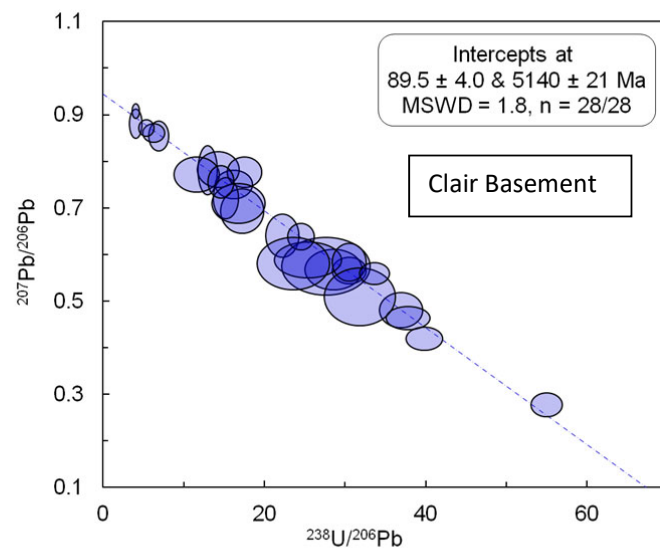

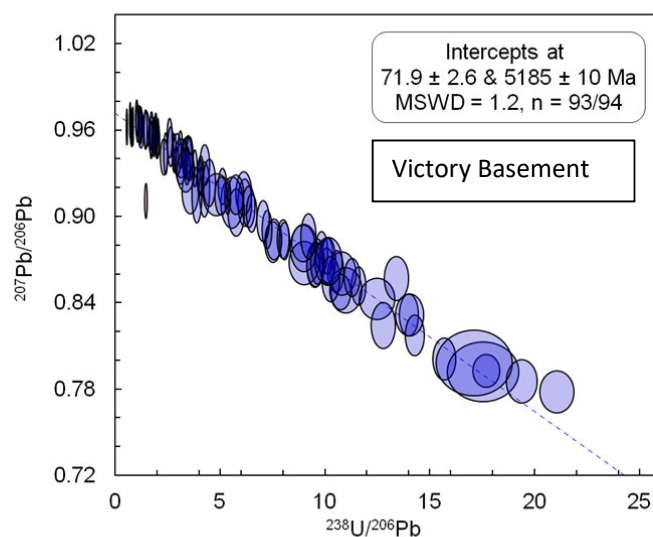

| Sample  | Age<br>(lower intercept) | 2s  | Y-Int<br>(207Pb/206Pb) | 2s    |
|---------|--------------------------|-----|------------------------|-------|
| Clair   | 89.5                     | 4.0 | 0.944                  | 0.013 |
| Victory | 71.9                     | 2.6 | 0.972                  | 0.002 |

### Analytical Conditions

| Laboratory & Sample Preparation    |                                                       |
|------------------------------------|-------------------------------------------------------|
| Laboratory name                    | NERC Isotope Geosciences Laboratory                   |
| Sample type/mineral                | Calcite                                               |
| Sample preparation                 | In-situ in polished block                             |
| Imaging                            | None                                                  |
| Laser ablation system              |                                                       |
| Make, Model & type                 | ESI/New Wave Research, 193UC                          |
| Ablation cell & volume             | NWR TV2                                               |
| Laser wavelength (nm)              | 193 nm                                                |
| Pulse width (ns)                   | 3-4 ns                                                |
| Fluence (J.cm <sup>-2</sup> )      | ~8 J/cm <sup>2</sup>                                  |
| Repetition rate (Hz)               | 10 Hz                                                 |
| Ablation duration (secs)           | 30 secs                                               |
| Ablation pit depth / ablation rate | ~45µm pit depth, measured using an optical microscope |
| Spot size (µm)                     | 100 µm                                                |
| Sampling mode /                    | Static spot ablation                                  |

|                                                    |                                                                                                                                                                                           |
|----------------------------------------------------|-------------------------------------------------------------------------------------------------------------------------------------------------------------------------------------------|
| pattern                                            |                                                                                                                                                                                           |
| Carrier gas                                        | 100% He, Ar make-up gas combined ca. 50% along sample line.                                                                                                                               |
| Cell carrier gas flow (l/min)                      | 0.6 l/min                                                                                                                                                                                 |
| <b>ICP-MS Instrument</b>                           |                                                                                                                                                                                           |
| Make, Model & type                                 | Nu Instruments Attom SC-SF-ICP-MS                                                                                                                                                         |
| Sample introduction                                | Free air aspiration of desolvator                                                                                                                                                         |
| RF power (W)                                       | 1300 W                                                                                                                                                                                    |
| Make-up gas flow (l/min)                           | 0.8 l/min Ar                                                                                                                                                                              |
| Detection system                                   | Discrete dynode MassCom ion counter                                                                                                                                                       |
| Masses measured                                    | 202, 204, 206, 207, 208, 232, 238                                                                                                                                                         |
| Integration time per peak                          | 200 $\mu$ s (202, 204, 208, 232), 400 $\mu$ s (206), 1000 $\mu$ s (207, 238)<br>80 sweeps per integration                                                                                 |
| Total integration time per reading (secs)          | 0.30 seconds                                                                                                                                                                              |
| Sensitivity / Efficiency (% , element)             | ~0.2 % for Uranium                                                                                                                                                                        |
| IC Dead time (ns)                                  | 15 ns                                                                                                                                                                                     |
| <b>Data Processing</b>                             |                                                                                                                                                                                           |
| Gas blank                                          | 60 second on-peak zero subtracted                                                                                                                                                         |
| Calibration strategy                               | NIST 614 for Pb-Pb, WC-1 for Pb-U                                                                                                                                                         |
| Reference Material info                            | Primary: WC-1 254 +/- 6 Ma (2s) - Roberts et al., 2017<br>Secondary: Duff Brown 64.04 +/- 0.67 Ma (2s) - Hill et al., 2016                                                                |
| Data processing package used / Correction for LIEF | Nu Instruments TRA acquisition software, in-house spreadsheet data processing                                                                                                             |
| Mass discrimination                                | $^{207}\text{Pb}/^{206}\text{Pb}$ , $^{206}\text{Pb}/^{238}\text{U}$ normalised to reference materials                                                                                    |
| Common-Pb correction, composition and uncertainty  | Unanchored (model 1) regressions in Tera-Wasserburg (Semi Total-Pb) plots.                                                                                                                |
| Uncertainty level & propagation                    | Ages in the data table are quoted at 2s absolute and include systematic uncertainties, propagation is by quadratic addition.                                                              |
| Quality control / Validation                       | <p>Duff Brown gave <math>64.2 \pm 2.2</math> Ma (without propagation of systematic uncertainties)</p> 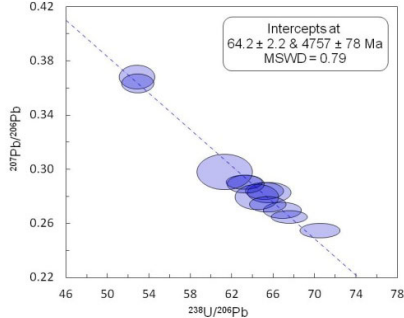 |

## FLUID INCLUSION SAMPLES, PETROGRAPHY AND ANALYTICAL METHODS

### *The samples*

Four fracture-hosted hydrothermal fills of calcite (3) and quartz (1), linked to brittle deformation (affecting both basement and local Devonian and Jurassic cover rocks), were subjected to fluid inclusion studies to estimate the temperatures of mineral precipitation. One core sample from each of three wells, located to the west of Shetland, UK, were sampled for FI studies: Well 205/21-A (Lancaster field, sample no. Lan 205/21-A, calcite fracture fill cutting Rona (Jurassic) sandstone, depth 4435m); Well 206/7A-2 (Clair field, sample no. Clair 206/7A-2, a quartz and a calcite fracture fill cutting Precambrian basement granite, depth 2599.5m) and Well 206/8-16 (Clair field, sample no. Clair 206/8-16, Clair Group (Devonian), calcite fracture fill cutting sandstone, depth 1879.2m) see Table 1.

| Sample                                       | FI Host | T <sub>H</sub> °C            | Salinity<br>(eq.wt.%NaCl) |
|----------------------------------------------|---------|------------------------------|---------------------------|
| Lancaster 205/21-A<br>Rona Sst. (4435m)      | Calcite | 88-133 (n=7)<br>(mean: 115)  | 1-3 (n=7)<br>(mean:2)     |
| Clair 206/8-16<br>Devonian Sst. (1879.2m)    | Calcite | 98-142 (n=4)<br>(mean: 114)  | 5-10 (n=4)<br>(mean: 6)   |
| Clair 206/7A-2<br>Basement granite (2599.5m) | Quartz  | 214-218 (n=5)<br>(mean: 217) | 4-8 (n=5)<br>(mean: 6)    |
|                                              | Calcite | 138-146 (n=7)<br>(mean:142)  | 5-13 (n=7)<br>(mean:7)    |

Table 1. Sample descriptions and microthermometric data for each fracture mineral fill.

### *FI petrography*

FI petrographic studies of the wafers, using a Nikon Eclipse E200 microscope revealed the dominant presence of two-phase aqueous fluid inclusions (i.e. Type 1) in all samples (Photomicrographs of Type 1). The Type 1 inclusions are two-phase (liquid + vapour; L > V)

aqueous inclusions and are classified as fluid inclusion assemblages in each sample. Their degree of fill,  $F$  ( $F = \text{vol. of liquid} / [\text{vol. of liquid} + \text{vapour}]$ ) is  $\sim 0.70$  (quartz) and  $\sim 0.90$  (calcite). They occur either as isolated individuals or in clusters and, as trails along annealed micro-fractures and are classified as being pseudosecondary to secondary FI. They range from c.  $2\mu\text{m}$  to  $30\mu\text{m}$  in longest dimension and display a range of morphologies that vary from irregular to ellipsoidal.

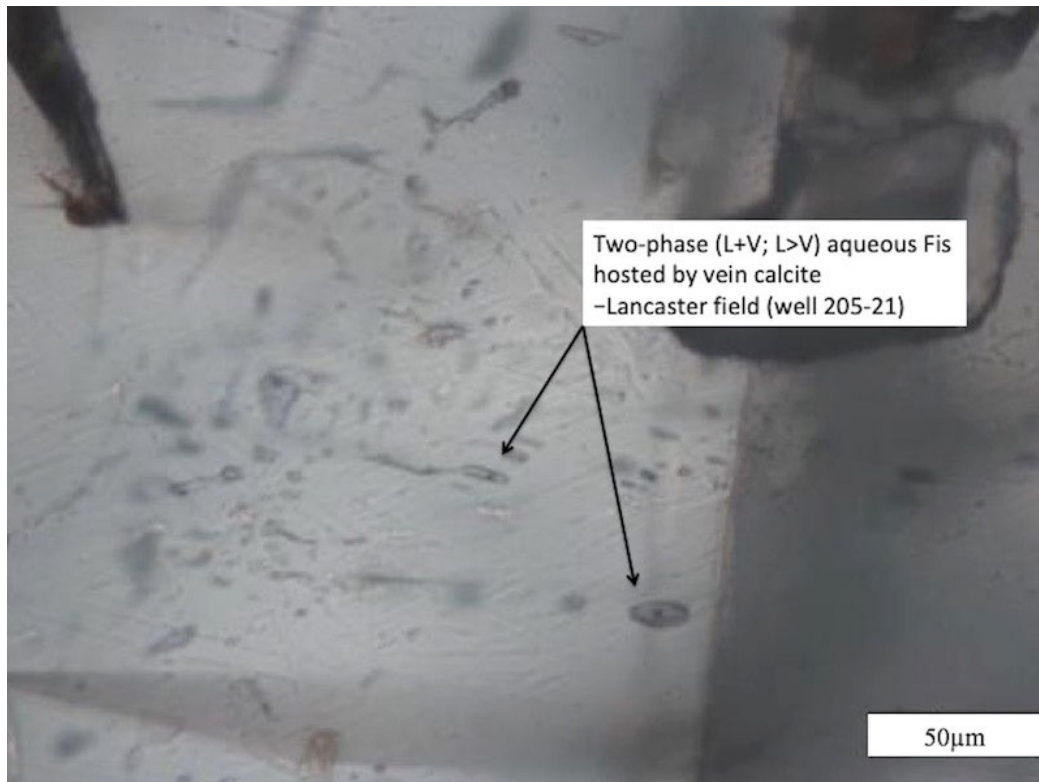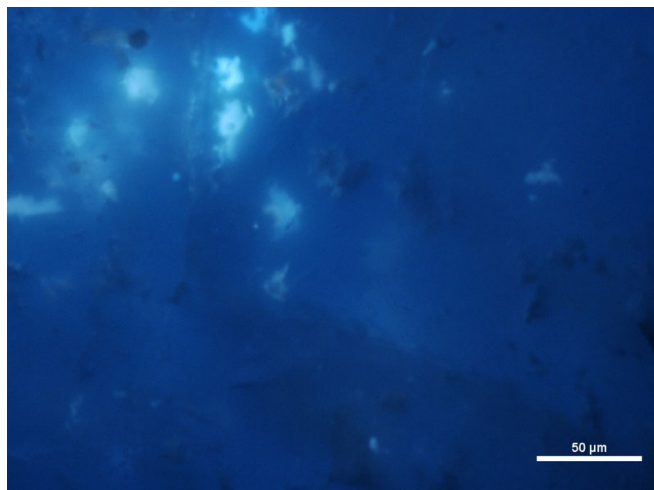

Left: Photomicrograph of fracture-hosted calcite containing two-phase (Liquid+Vapour; degree of fill  $\sim 0.90$ ) hydrocarbon-bearing fluid inclusions displaying blue fluorescence in UV light. Sample Clair 206/8-16 (1879.2m).

### ***FI microthermometry***

Microthermometric analyses was performed using a calibrated Linkam THGMS 600 heating-freezing stage, mounted on an Olympus transmitted light microscope at the Geofluids Research Laboratory, National University of Ireland, Galway. Calibration of the stage was performed using synthetic fluid inclusion standards (i.e. pure CO<sub>2</sub> and water). Precision is  $\pm 0.2^{\circ}\text{C}$  at  $-56.5^{\circ}\text{C}$  and  $\pm 2^{\circ}\text{C}$  at  $300^{\circ}\text{C}$ . The FI were subjected to heating and cooling cycles: ice formed during cooling of the inclusions to  $\sim -110^{\circ}\text{C}$  and during subsequent heating, both the temperature of first ice melting ( $T_{\text{FM}}$ ) and the temperature of last ice melting ( $T_{\text{LM}}$ ) were recorded. The recorded  $T_{\text{FM}}$  values of c.  $-20.8^{\circ}\text{C}$  equate to the eutectic melting point of the system NaCl-H<sub>2</sub>O (Shepherd *et al.* 1985). The  $T_{\text{LM}}$  values were used to calculate salinity as equivalent weight % NaCl (eq. wt.% NaCl) after Bodnar (1993). Subsequent heating of the FI, facilitates the measurement of the temperature of homogenisation ( $T_{\text{H}}$ ) i.e. the temperature at which the liquid and vapour phases homogenise to the liquid phase (for L-rich two-phase FI like Type 1).  $T_{\text{H}}$  in general is the minimum trapping temperature at which the fluid was trapped as the fluid inclusion formed.

### **REFERENCES**

- Beaudoin, N., Lacombe, O., Roberts, N.M. and Koehn, D., 2018. U-Pb dating of calcite veins reveals complex stress evolution and thrust sequence in the Bighorn Basin, Wyoming, USA. *Geology*, 46(11), pp.1015-1018.
- Bodnar R.J., 1993. Revised equation and table for determining the freezing point depression of H<sub>2</sub>O-NaCl solutions. *Geochimica et Cosmochimica Acta*, 57, 683-684.
- Hill, C.A., Polyak, V.J., Asmerom, Y. and P. Provencio, P., 2016. Constraints on a Late Cretaceous uplift, denudation, and incision of the Grand Canyon region, southwestern Colorado Plateau, USA, from U-Pb dating of lacustrine limestone. *Tectonics*, 35(4), pp.896-906.
- Horstwood, M.S., Košler, J., Gehrels, G., Jackson, S.E., McLean, N.M., Paton, C., Pearson, N.J., Sircombe, K., Sylvester, P., Vermeesch, P. and Bowring, J.F., 2016. Community-derived standards for LA-ICP-MS U-(Th-) Pb geochronology—Uncertainty propagation, age interpretation and data reporting. *Geostandards and Geoanalytical Research*, 40(3), pp.311-332.



Roberts, N.M., Rasbury, E.T., Parrish, R.R., Smith, C.J., Horstwood, M.S. and Condon, D.J., 2017. A calcite reference material for LA-ICP-MS U-Pb geochronology. *Geochemistry, Geophysics, Geosystems*, 18(7), pp.2807-2814.

Roberts, N.M. and Walker, R.J., 2016. U-Pb geochronology of calcite-mineralized faults: Absolute timing of rift-related fault events on the northeast Atlantic margin. *Geology*, 44(7), pp.531-534.

Shepherd, T.J., Rankin, A.H. and Alderton, D.H.M., 1985. A practical guide to fluid inclusion studies. Glasgow and London, Distributed in the USA by Chapman and Hall, New York.

Woodhead, J.D. and Hergt, J.M., 2001. Strontium, neodymium and lead isotope analyses of NIST glass certified reference materials: SRM 610, 612, 614. *Geostandards Newsletter*, 25(2-3), pp.261-266.

2019254\_Dataset.xlsx
